# Supplementary material for: Novel Function of Nogo-A as Negative Regulator of Endothelial Progenitor Cell Angiogenic Activity: Impact in Oxygen-Induced Retinopathy
Source: MDPI journal article supplement (doi:10.3390/ijms241713185), 2023-08-24
Supplement: s1 [file s1]

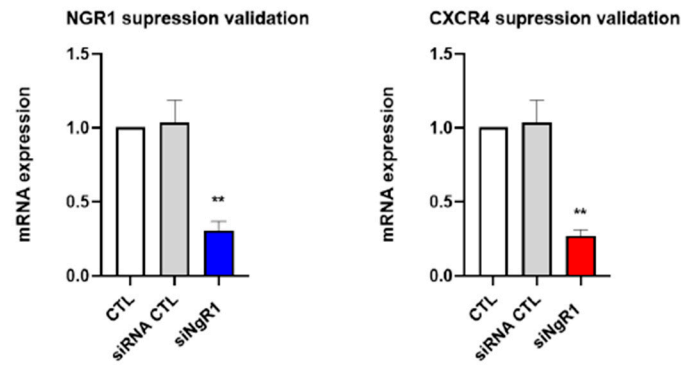

**Supplemental Figure S1.** Efficacy of siRNA-NGR1 and siRNA-CXCR4 in EPCs. qRT-PCR analyses of EPCs transfected with an siRNA-NGR1 or siRNA-CXCR4 24h after transfection.

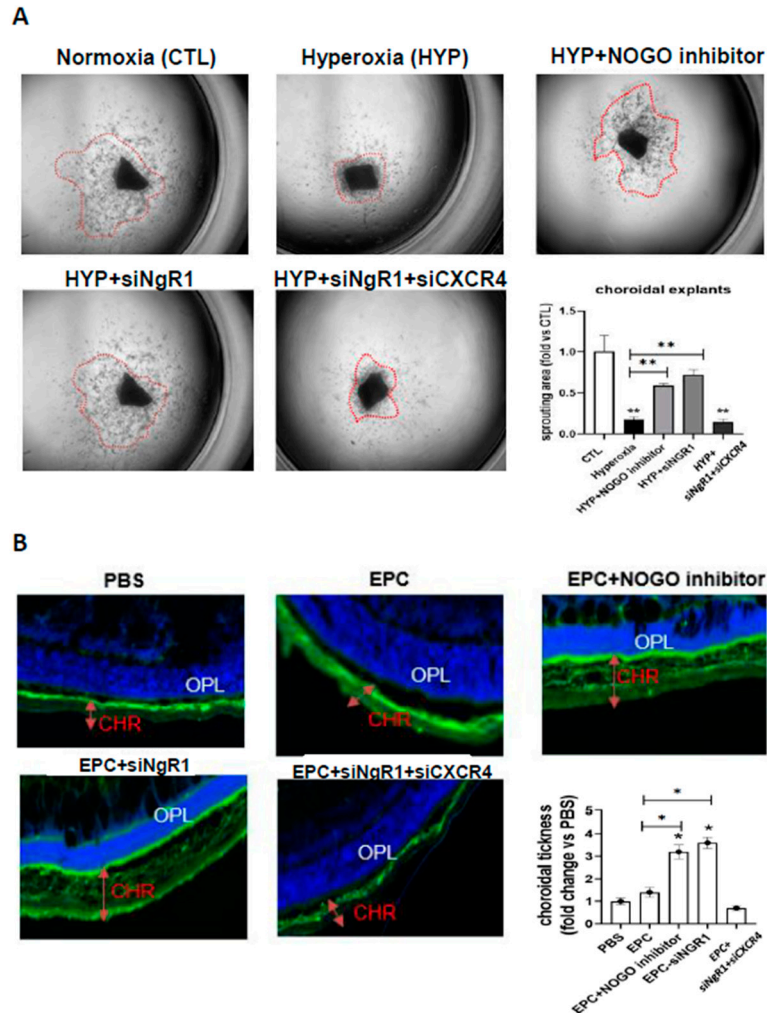

**Supplemental Figure S2.** Effects of NOGO/NgR1 inhibition on choroidal sprouting ex vivo (A) and on choroid thickness in rats subjected to OIR (B). A. Ex-vivo choroidal sprouting assay of P10-isolated choroid of normoxic rats; choroids were plated in Matrigel in complete EGM medium and treated with an NOGO inhibitor, siNgR1 or siNgR1+siCXCR4, and subjected to hyperoxia. B. Representative images and quantification analyses of choroidal thickness in retinal cross-section stained for vessel (isolectin positive, green) and DAPI in OIR-subjected rats treated with the same conditions. Data were mean  $\pm$  SEM. \* $p < 0.05$  or \*\* $p < 0.005$  vs PBS (control) or normoxic CTL. N=5 choroids.
